# Supplementary material for: Novel metal–organic frameworks based on 5-bromonicotinic acid: Multifunctional materials with H2 purification capabilities
Source: Royal Society of Chemistry journal article supplement (doi:10.1039/c2ce25807b), 2012-01-01
Supplement: c2ce25807b.pdf [file c2ce25807b.pdf]

Supporting Information for:

## NOVEL METAL-ORGANIC FRAMEWORKS BASED ON 5-BROMONICOTINIC ACID: MULTIFUNCTIONAL MATERIALS WITH H<sub>2</sub> PURIFICATION CAPABILITIES

Antonio J. Calahorro,<sup>a</sup> Marta E. López-Viseras,<sup>a</sup> Alfonso Salinas-Castillo,<sup>b</sup> David Fairen-Jimenez,<sup>c,\*</sup>  
Enrique Colacio,<sup>a</sup> Joan Cano<sup>d</sup> and Antonio Rodríguez-Diéguez.<sup>a,\*</sup>

<sup>a</sup>Departamento de Química Inorgánica, Universidad de Granada, 18071, Granada, Spain.

Tel: 0034958240442; E-mail: antonio5@ugr.es

<sup>b</sup>Departamento de Química Analítica, Universidad de Granada.

<sup>c</sup>Institute for Materials and Processes, School of Engineering, The University of Edinburgh, United Kingdom. Email: David.Fairen-Jimenez@Northwestern.edu

<sup>d</sup>Instituto de Ciencia Molecular (ICMol) and Fundació General de la Universitat de València (FGUV), Catedrático José Beltrán nº 2, Universitat de València, E-46980 Paterna, València, Spain.

### Luminescence Properties

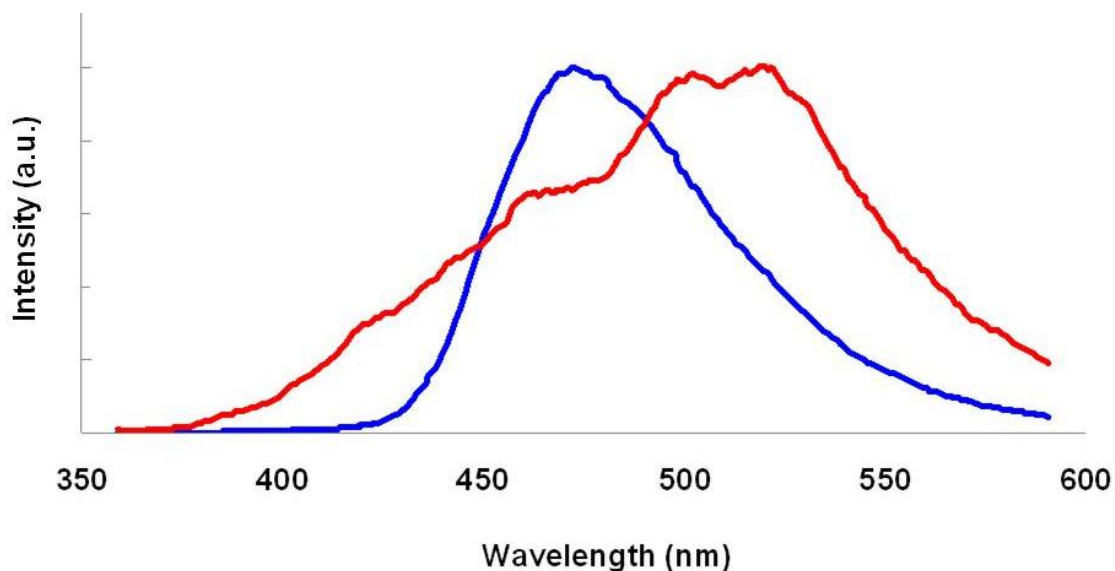

**Figure S1.** The emission spectra of **1**, red line, and 5-BrNic, blue line, in solid state at room temperature.

## Crystal Data

Crystal Data. **1**:  $[\text{Cd}(\text{C}_{12}\text{H}_6\text{N}_2\text{O}_4\text{Br}_2)]$ ,  $M = 514.41$ , monoclinic, space group  $P2_1/n$ ,  $a = 11.2814(12)$ ,  $b = 9.9474(11)$ ,  $c = 13.2863(15)$  Å,  $\beta = 108.7840(10)$ ,  $V = 1411.6(3)$  Å<sup>3</sup>,  $Z = 4$ ,  $\rho_{\text{calcd}} = 2.421$  g cm<sup>-3</sup>,  $\mu(\text{Mo-K}\alpha) = 7.223$  mm<sup>-1</sup>,  $R_{\text{int}} = 0.0341$ ,  $T = 293$  K,  $R1(F_o) = 0.0323$ ,  $(wR2(F_o^2)) = 0.0723$  with a goodness-of-fit on  $F^2$  1.021. **2**:  $[\text{Co}(\text{C}_{24}\text{H}_{12}\text{N}_4\text{O}_8\text{Br}_4)(\text{H}_2\text{O})]$ ,  $M = 939.89$ , monoclinic, space group  $C2/c$ ,  $a = 15.0926(18)$ ,  $b = 16.9747(18)$ ,  $c = 14.4400(16)$  Å,  $\beta = 120.52(4)$ ,  $V = 3186.9(6)$  Å<sup>3</sup>,  $Z = 4$ ,  $\rho_{\text{calcd}} = 1.959$  g cm<sup>-3</sup>,  $\mu(\text{Mo-K}\alpha) = 6.109$  mm<sup>-1</sup>,  $R_{\text{int}} = 0.0964$ ,  $T = 293$  K,  $R1(F_o) = 0.0669$ ,  $(wR2(F_o^2)) = 0.2040$  with a goodness-of-fit on  $F^2$  1.064. Data were collected by  $\omega/2\theta$  scans ( $2\theta_{\text{max}} = 51.98^\circ$  and  $36.58^\circ$  for **1** and **2**, respectively) on a Bruker APEXII diffractometer with graphite-monochromated MoK $\alpha$  radiation ( $\lambda = 0.71073$  Å). The structures were solved by direct methods and refined on F2 by the SHELX-97 program.

## Magnetic Properties

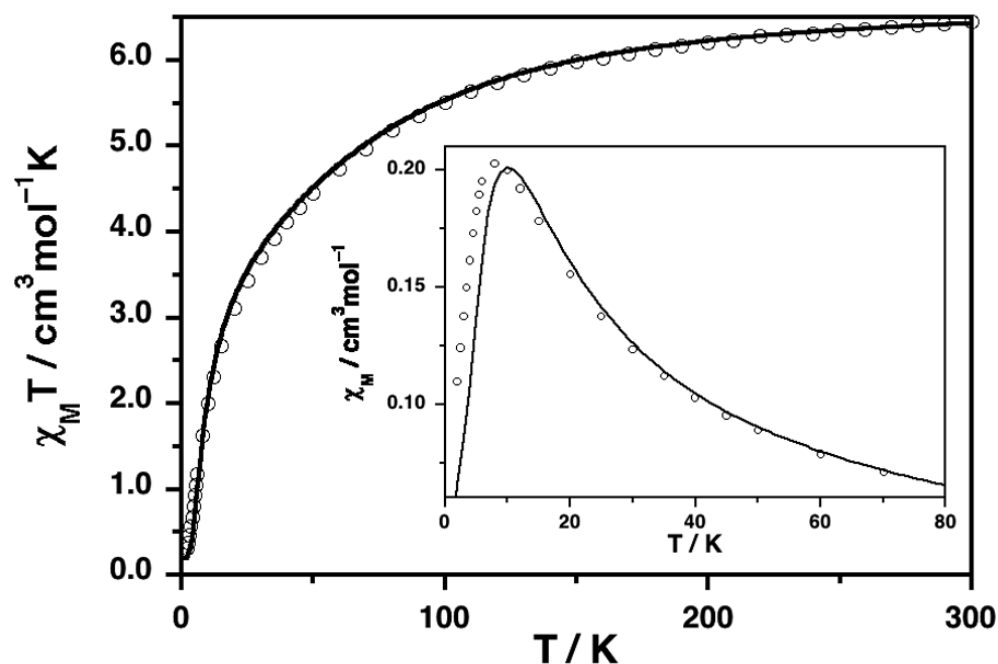

**Figure S2.** Temperature dependence of  $\chi_M T$  ( $\Delta$ ) and  $\chi_M$  ( $\circ$ , inset) for **2**. The solid lines correspond to the best fit.

## Experimental Isotherms

Excess H<sub>2</sub> adsorption isotherms at 77 K were obtained over the 0-20 bar pressure range by volumetric analysis (PCI instrument from Advanced Materials Corp., Pittsburgh, PA). The non-ideality of hydrogen was taken into account by using the Peng-Robinson equation of state.<sup>1</sup> Prior to the measurements, samples were activated on a high vacuum line ( $10^{-4}$  mbar) at 120 C overnight.

## Computational Details

The material was characterized geometrically, starting from the crystallographic coordinates. The geometric pore size distribution was calculated, which is related to the diameter of the largest sphere that can fit into the cavities without overlapping with any of the framework atoms<sup>17</sup> and the accessible surface area<sup>2</sup> using different probe molecules (Figure S1). Additionally, hydrogen adsorption at 77 K on **2** was studied using grand canonical Monte Carlo (GCMC) simulations (Figure S2).<sup>3</sup> In the grand canonical ensemble, the chemical potential, the volume, and the temperature are kept fixed as in adsorption experiments. An atomistic model was used for **2**, with the atoms frozen at the crystallographic positions. In the simulation, hydrogen molecules were randomly moved, rotated, inserted, and deleted, allowing the number of molecules in the framework to fluctuate. The chemical potential was related to the system pressure by the Peng-Robinson equation of state.<sup>4</sup> The standard 12-6 Lennard-Jones (LJ) potential was used to model the interatomic interactions. The parameters for the framework atoms were obtained from the UFF force field,<sup>5</sup> while molecular hydrogen was modeled by two LJ spheres ( $\sigma_{\text{H}}=2.72\text{\AA}$ ,  $\epsilon_{\text{H}}/k\text{B} = 10.00\text{ K}$ ,  $d_{\text{H-H}}=0.74\text{\AA}$ )<sup>6,7</sup>. The Lorentz\_Berthelot mixing rules were employed to calculate the mixed parameters. Interactions beyond  $17\text{\AA}$  were neglected for the simulations. Quantum effects were taken into account using the Feynman-Hibbs effective potential method,<sup>8</sup> which is sufficiently accurate at 77 K.<sup>6,9,10</sup> A total number of  $2 \times 10^7$  Monte Carlo steps were performed. The first 50% was used for system equilibration, carefully ensuring that thermodynamic equilibrium was reached, while the remaining steps were used to calculate the ensemble averages.

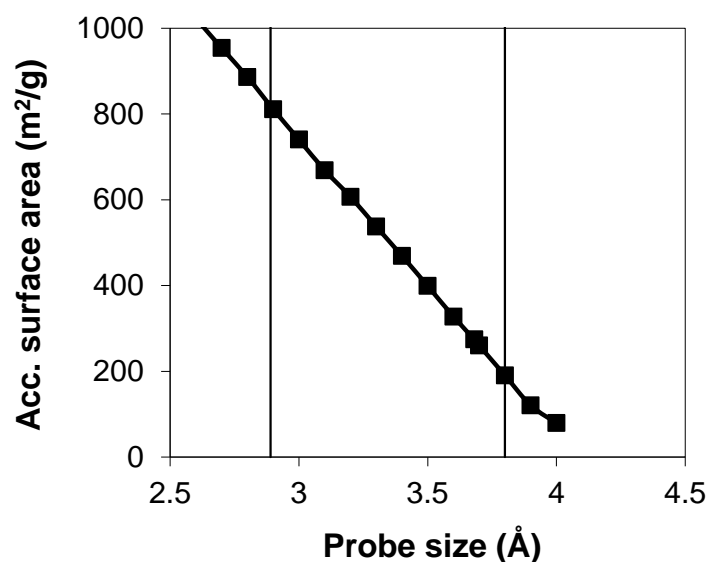

**Figure S3.** Accessible surface area of **2** obtained with different probe molecules with a diameter ranging between 2.6 and 4.0 Å. Vertical lines show the kinetic diameter of H<sub>2</sub> (2.89 Å) and CH<sub>4</sub> (3.8 Å), and so the accessible surface areas for this compound.

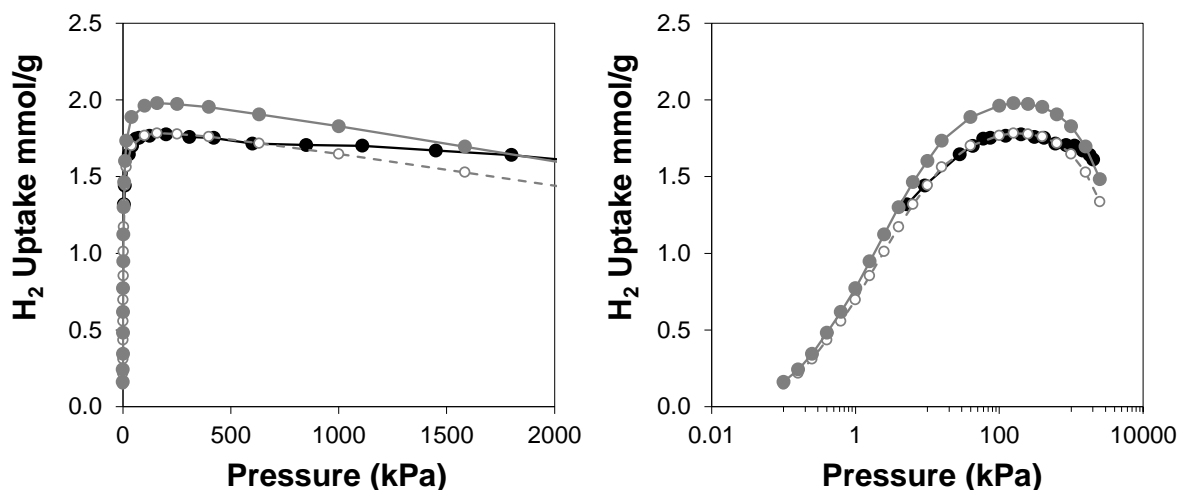

**Figure S4.** (*left*) Experimental, black closed circles, and simulated, grey closed circles, H<sub>2</sub> isotherms at 77 K on **2**. Scaled ( $\Pi = 0.91$ ) simulated isotherms, grey open circles. (*right*) Semilog representation of the H<sub>2</sub> isotherms.

## References

1. R. C. Reid, J. M. Pausnitz and B. E. Poling, *The properties of gases & liquids*, 4th edn., McGraw-Hill Companies, New York, 1987.
2. T. Düren, F. Millange, Gérard Férey, Krista S. Walton, and, Randall Q. Snurr *J. Phys. Chem. C* 2007 **111**, (42), 15350-15356.
3. Frenkel, D.; Smit, B. *Understanding Molecular Simulations: From Algorithms to Applications*, 2nd ed.; Academic Press: San Diego, 2002.
4. R. C. Reid, J. M. Pausnitz and B. E. Poling, *The properties of gases & liquids*, 4th edn., McGraw-Hill Companies, New York, 1987.
5. A. K. Rappé, C. J. Casewit, K. S. Colwell, W. A. Goddard and W. M. Skiff, *Journal of the American Chemical Society*, 1992, **114**, 10024-10035.
6. Q. Yang and C. Zhong, *The Journal of Physical Chemistry B*, 2005, **109**, 11862-11864.
7. A. Rossin, D. Fairen-Jimenez, T. Düren, G. Giambastiani, M. Peruzzini and J. G. Vitillo, *Langmuir*, 2011, **27**, 10124-10131.
8. Feynman, R. P.; Hibbs, A. R. *Quantum Mechanics and Path Integrals*; McGraw-Hill: New York, 1965.
9. Neumann, M.; Zoppi, M. *Phys. Rev. A* 1989, **40**, 4572-4584
10. J. Liu, J. T. Culp, S. Natesakhawat, B. C. Bockrath, B. Zande, S. G. Sankar, G. Garberoglio and J. K. Johnson, *The Journal of Physical Chemistry C*, 2007, **111**, 9305-9313.
